# Supplementary material for: Repeatability and reproducibility assessment in a large-scale population-based microbiota study: case study on human milk microbiota
Source: PubMed Central journal article supplement (PMC7877029; doi:10.1186/s40168-020-00998-4), 2021-02-10

## Supplemental information

Repeatability and reproducibility assessment in a large-scale population-based microbiota study: case study on human milk microbiota. Moossavi et al. Microbiome

**Table S1.** Characteristics of mother-infant dyads from the CHILD cohort included in this study (n=870).

**Table S2.** Comparison of the performance of contaminant identification using decontam and the data structure.

**Figure S1.** Within-batch contaminant identification.

**Figure S2.** Quality control checks for between-batch contaminant identification.

**Figure S3.** Within-batch Spearman rank correlation assessment of the potential contaminant and non-contaminants.

**Table 1. Characteristics of mother-infant dyads from the CHILD cohort included in this study (n=870).**

| Factor       |                                                   | Mean ± SD<br>or n (%)                         |                                                  | P value          | Mean ± SD<br>or n (%) |
|--------------|---------------------------------------------------|-----------------------------------------------|--------------------------------------------------|------------------|-----------------------|
|              |                                                   | Initial subset<br>Batch 1, N=337 <sup>a</sup> | Additional subset<br>Batch 2, N=533 <sup>a</sup> |                  | All<br>N=870          |
| Maternal     | Age (years)                                       | 33.1±4.1                                      | 32.8±4.4                                         | 0.284            | 32.9±4.3              |
|              | Pre-pregnancy BMI (Kg/m <sup>2</sup> )            | 24.6±5.2                                      | 24.6±5.1                                         | 0.848            | 24.6±5.1              |
|              | History of atopy                                  | 190 (56.9)                                    | 315 (60.6)                                       | 0.318            | 505 (59.1)            |
|              | Asthma                                            | 72 (21.4)                                     | 135 (26.1)                                       | 0.138            | 207 (24.2)            |
|              | Secretor status                                   | 245 (73.6)                                    | 414 (77.7)                                       | 0.196            | 659 (76.1)            |
|              | Ethnicity                                         |                                               |                                                  |                  |                       |
|              | Caucasian                                         | 253 (75.1)                                    | 378 (72.6)                                       | 0.109            | 631 (73.5)            |
|              | Asian                                             | 57 (16.9)                                     | 80 (15.4)                                        |                  | 137 (16.0)            |
|              | First Nations                                     | 12 (3.6)                                      | 17 (3.3)                                         |                  | 29 (3.4)              |
|              | Other                                             | 15 (4.5)                                      | 46 (8.8)                                         |                  | 61 (7.1)              |
| Ever smoking | 75 (22.3)                                         | 140 (26.8)                                    | 0.153                                            | 215 (25.0)       |                       |
| Infant       | Birth weight (g)                                  | 3,470±464                                     | 3,446±498                                        | 0.444            | 3,455±485             |
|              | Male sex                                          | 184 (54.6)                                    | 304 (57.0)                                       | 0.525            | 488 (56.1)            |
|              | Gestational age (weeks)                           | 39.6±1.3                                      | 39.5±1.4                                         | 0.414            | 39.5±1.3              |
|              | Secretor status                                   | 250 (79.9)                                    | 353 (77.2)                                       | 0.435            | 603 (78.3)            |
|              | Atopy at 1                                        | 45 (13.5)                                     | 106 (21.1)                                       | <b>0.007</b>     | 151 (18.1)            |
|              | Atopy at 3                                        | 56 (17.0)                                     | 102 (21.0)                                       | 0.188            | 158 (19.4)            |
|              | Asthma at 3                                       |                                               |                                                  | <b>&lt;0.001</b> |                       |
|              | Possible                                          | 30 (8.9)                                      | 74 (15.2)                                        |                  | 104 (12.6)            |
|              | Probable                                          | 20 (5.9)                                      | 59 (12.1)                                        |                  | 79 (9.6)              |
|              | Asthma at 5                                       |                                               |                                                  | <b>0.001</b>     |                       |
| Possible     | 29 (8.9)                                          | 58 (12.3)                                     | 87 (10.9)                                        |                  |                       |
| Definite     | 20 (6.1)                                          | 61 (13.0)                                     |                                                  | 81 (10.2)        |                       |
| Early life   | Mode of delivery                                  |                                               |                                                  | 0.238            |                       |
|              | Vaginal                                           | 252 (75.9)                                    | 368 (71.5)                                       |                  | 620 (73.2)            |
|              | Elective C/S                                      | 40 (12.0)                                     | 64 (12.4)                                        |                  | 104 (12.3)            |
|              | Emergency C/S                                     | 40 (12.0)                                     | 83 (16.1)                                        |                  | 123 (14.5)            |
|              | Maternal intrapartum antibiotics                  | 119 (35.7)                                    | 227 (44.1)                                       | <b>0.019</b>     | 346 (40.8)            |
|              | Maternal postpartum antibiotics before 3-4 months | 32 (9.6)                                      | 63 (12.2)                                        | 0.291            | 95 (11.2)             |
|              | Child antibiotics before 3-4 months               | 7 (2.1)                                       | 11 (2.1)                                         | 1.000            | 18 (2.1)              |
| Multiparity  | 159 (47.2)                                        | 215 (41.2)                                    | 0.097                                            | 374 (43.5)       |                       |
| BF & HMOs    | Direct BF (at the breast) only                    | 139 (41.2)                                    | 187 (35.8)                                       | 0.240            | 326 (38.0)            |
|              | Duration of BF (months)                           | 12.9±5.9                                      | 12.3±6.2                                         | 0.154            | 12.5±6.1              |
|              | Duration of exclusive BF (months)                 | 3.4±2.3                                       | 3.3±2.2                                          | 0.357            | 3.3±2.3               |
|              | HMO concentration (mg/mL)                         | 10.3±2.1                                      | 10.4±2.1                                         | 0.755            | 10.4±2.1              |
|              | HMO Simpson's diversity                           | 4.9±1.4                                       | 4.9±1.4                                          | 0.489            | 4.9±1.4               |
| Environment  | Study city                                        |                                               |                                                  | 0.248            |                       |
|              | Edmonton                                          | 81 (24.0)                                     | 98 (18.8)                                        |                  | 179 (20.8)            |
|              | Toronto                                           | 92 (27.3)                                     | 142 (27.2)                                       |                  | 234 (27.2)            |
|              | Vancouver                                         | 81 (24.0)                                     | 132 (25.3)                                       |                  | 213 (24.8)            |
|              | Winnipeg                                          | 83 (24.6)                                     | 150 (28.7)                                       |                  | 233 (27.1)            |
|              | Milk collection in spring <sup>b</sup>            | 59 (17.6)                                     | 168 (32.3)                                       | <b>&lt;0.001</b> | 227 (26.5)            |
|              | Birth season                                      |                                               |                                                  | <b>0.045</b>     |                       |
|              | Spring                                            | 98 (29.1)                                     | 140 (26.8)                                       |                  | 238 (27.7)            |
|              | Summer                                            | 101 (30.0)                                    | 123 (23.6)                                       |                  | 224 (26.1)            |
|              | Autumn                                            | 75 (22.3)                                     | 123 (23.6)                                       |                  | 201 (23.4)            |
| Winter       | 63 (18.7)                                         | 133 (25.5)                                    | 196 (22.8)                                       |                  |                       |

<sup>a</sup> N after pre-processing of microbiome data, contaminant removal, and rarefaction; <sup>b</sup> versus other seasons combined. BF, breastfeeding; C/S: Caesarian section; HMO, human milk oligosaccharide

**Table 2. Comparison of the performance of contaminant identification using *decontam* and the data structure. Also see Figure S1 and Figure 2.**

| Parameters                                                                             | <i>decontam</i>                    | Data structure                        |                 |                                         |             |             | All unique contaminants identified |
|----------------------------------------------------------------------------------------|------------------------------------|---------------------------------------|-----------------|-----------------------------------------|-------------|-------------|------------------------------------|
|                                                                                        |                                    | Between-run contaminants <sup>1</sup> |                 | Between-batch contaminants <sup>1</sup> |             |             |                                    |
|                                                                                        |                                    | Batch 1                               | Batch 2         | Batch 1                                 | Batch 2     |             |                                    |
| Number of ASVs identified as contaminant                                               | 256                                | 198                                   | 66 <sup>2</sup> | 623                                     | 37          | 769         |                                    |
| Average prevalence of a contaminant ASV (%)                                            | 0.56                               | 0.6 (0.9)                             | 2.9 (14.3)      | 5.6 (14.9)                              | 1.3 (6.7)   | 4.8 (15.1)  |                                    |
| Batch 1, Run 1 (n=215)                                                                 | 0.99                               | 2.2 (1.2)                             | 6.3 (19.9)      | 15.4 (27.3)                             | 0           | 12.7 (25.2) |                                    |
| Batch 1, Run 2 (n=213)                                                                 | 0.68                               | 0.4 (0.9)                             | 6.4 (20.2)      | 15.4 (28.5)                             | 0           | 12.6 (26.3) |                                    |
| Batch 2, Run 1 (n=252)                                                                 | 0.45                               | 0.1 (0.5)                             | 0.9 (1.0)       | 0.1 (0.5)                               | 2.4 (6.1)   | 0.3 (1.5)   |                                    |
| Batch 2, Run 2 (n=253)                                                                 | 0.42                               | 0.1 (0.4)                             | 1.1 (1.0)       | 0.1 (0.5)                               | 2.0 (4.3)   | 0.3 (1.2)   |                                    |
| Batch 2, Run 3 (n=255)                                                                 | 0.37                               | 0.1 (0.4)                             | 0.7 (0.8)       | 0.1 (0.5)                               | 1.7 (2.8)   | 0.3 (0.9)   |                                    |
| Average percent of reads per sample identified as contaminants (%)                     | 0.73                               | 0.2 (1.4)                             | 1.3 (2.9)       | 18.6 (29.8)                             | 0.2 (1.4)   | 19.2 (29.7) |                                    |
| Batch 1, Run 1 (n=215)                                                                 | 0.62                               | 0.4 (1.7)                             | 2.7 (1.7)       | 51.0 (28.9)                             | 0           | 51.2 (28.8) |                                    |
| Batch 1, Run 2 (n=213)                                                                 | 0.13                               | 0.2 (0.9)                             | 3.1 (1.6)       | 51.6 (27.4)                             | 0           | 51.9 (27.3) |                                    |
| Batch 2, Run 1 (n=252)                                                                 | 1.08                               | 0.2 (1.2)                             | 0.2 (1.2)       | 0.1 (0.5)                               | 0.5 (1.7)   | 1.0 (2.6)   |                                    |
| Batch 2, Run 2 (n=253)                                                                 | 1.16                               | 0.2 (1.9)                             | 0.5 (4.1)       | 0.2 (0.8)                               | 0.3 (1.7)   | 1.0 (4.6)   |                                    |
| Batch 2, Run 3 (n=255)                                                                 | 0.53                               | 0.1 (0.9)                             | 0.4 (3.0)       | 0.3 (1.2)                               | 0.3 (1.7)   | 1.1 (3.9)   |                                    |
| Percent of total contaminant reads (%)                                                 | 18.2 (31.2)                        | 6.1 (19.3)                            | 13.0 (24.0)     | 51.8 (45.0)                             | 14.6 (28.2) | 81.8 (31.2) |                                    |
| Agreement of remaining ASVs <sup>3</sup>                                               | ICC <sub>A</sub> = 0.58            | ICC <sub>A</sub> = 0.96               |                 |                                         |             |             |                                    |
| Batch effect on the overall composition following removal of contaminants <sup>4</sup> | R <sup>2</sup> = 17.9% (p = 0.001) | R <sup>2</sup> = 1.4% (p = 0.001)     |                 |                                         |             |             |                                    |

<sup>1</sup>There is some overlap in the contaminants identified within the various between-run and between-batch comparisons, Figure S4 shows the overlap in ASVs were identified as contaminants among comparisons.

<sup>2</sup>5 ASVs identified as between-run Batch 2 contaminants were also identified as Batch 1 contaminants by Between-batch comparisons and accounted for an average of 2.6% and 3.0% of reads per sample in Run 1 and Run 2 of Batch 1, respectively. <sup>3</sup>The agreement in ASV average relative abundances between batches using intraclass correlation (ICC) after removal of contaminant ASVs. <sup>4</sup>Using ADONIS from the *vegan* package on Bray-Curtis dissimilarity (see Figure 2E-2G for PCoA plots). Started at R<sup>2</sup> = 17.9% (p = 0.001) prior to any contaminant removal.

**Figure S1. Within-batch contaminant identification.** ASV prevalence was compared between A) Run 1 and Run 2 within Batch 1 (N=198 identified as contaminant), B) Run 1 and Run 2 within Batch 2 (N=33 identified as contaminant), C) Run 1 and Run 3 within Batch 2 (N=21 identified as contaminant), and D) Run 2 and Run 3 within Batch 2 (N=32 identified as contaminant). A total of 66 unique ASVs were identified as within-Batch 2 contaminants (There was some overlap in contaminant ASVs identified between different runs of Batch 2). We defined contaminants as any ASV with higher prevalence in one run as would be expected in the other run according to the standard error of prevalence calculated based on the sample size. The acceptable threshold is represented by the orange lines. ASVs below the orange lines were identified as potential contaminants. All the identified contaminants have very low prevalence (2% on average) and thus are concentrated in the lower left corner of the figures. Between-run identification of contaminants were performed after applying decontam but prior to between batch comparison (see **Figure 2**). ASV, amplicon sequencing variant; ICC, intraclass correlation coefficient.

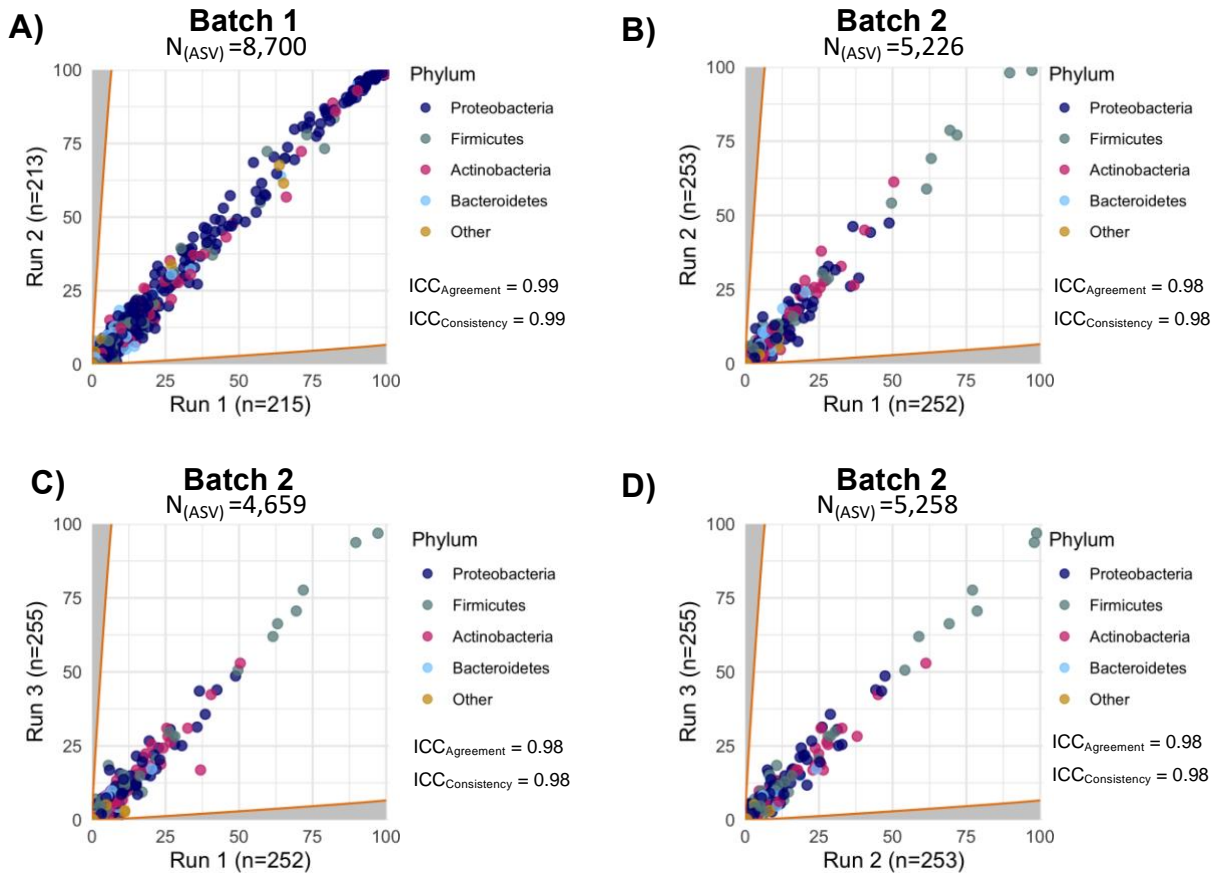

**Figure S2. Quality control checks for between-batch contaminant identification.** A) Comparing ASV prevalence between batches for a homogenous subset from mothers that 1) were primiparous, 2) directly breastfed, 3) who's child did not have asthma at 5 years. B-D) Comparisons of ASV prevalence between batches with different sample sizes. Samples were selected from the homogenous subset of Figure S2A. We defined contaminants as any ASV with higher prevalence in one run as would be expected in the other run according to the standard error of prevalence calculated based on the sample size. The acceptable threshold is represented by the orange lines. ASVs below the orange lines were identified as potential contaminants. Between-run identification of contaminants were performed after applying decontam but prior to between batch comparison (see Figure 2). ASV, amplicon sequencing variant; ICC, intraclass correlation coefficient.

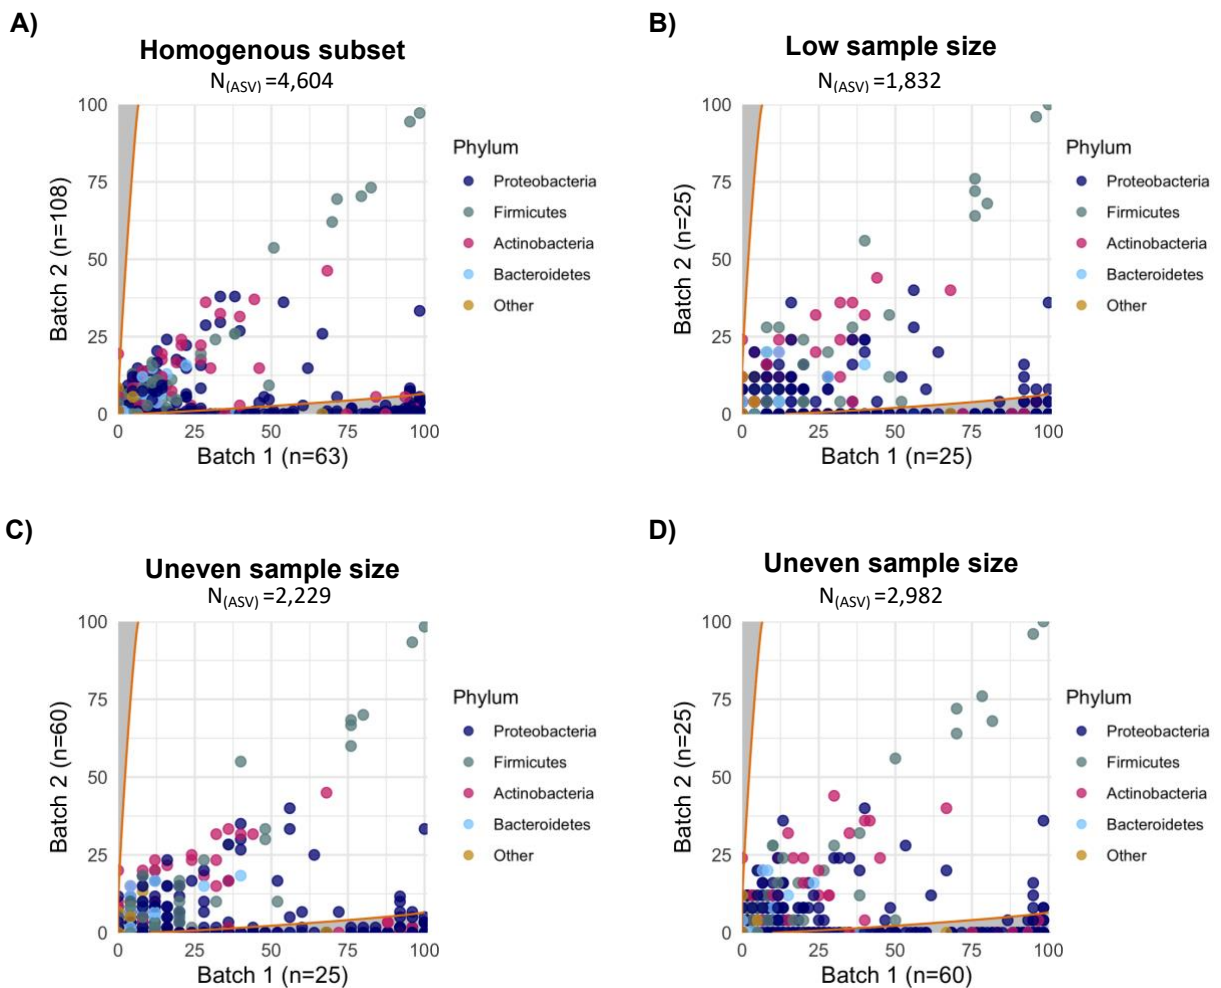

**Figure S3. Within-batch Spearman rank correlation assessment of the potential contaminant and non-contaminants.** A) Correlation of contaminant ASVs (n=51) and B) non-contaminant ASVs (n=58) within Batch 1. C) Correlation of non-contaminant ASVs (n=76) within Batch 2. We defined contaminants as any ASV with higher prevalence in one run as would be expected in the other run according to the standard error of prevalence calculated based on the sample size. ASVs with > 0.1% mean relative abundance are included (see Figure 2). Potential contaminants in Batch 2 had less than 0.1% mean relative abundance; and thus within-batch correlation of Batch 2 contaminants is not assessed.

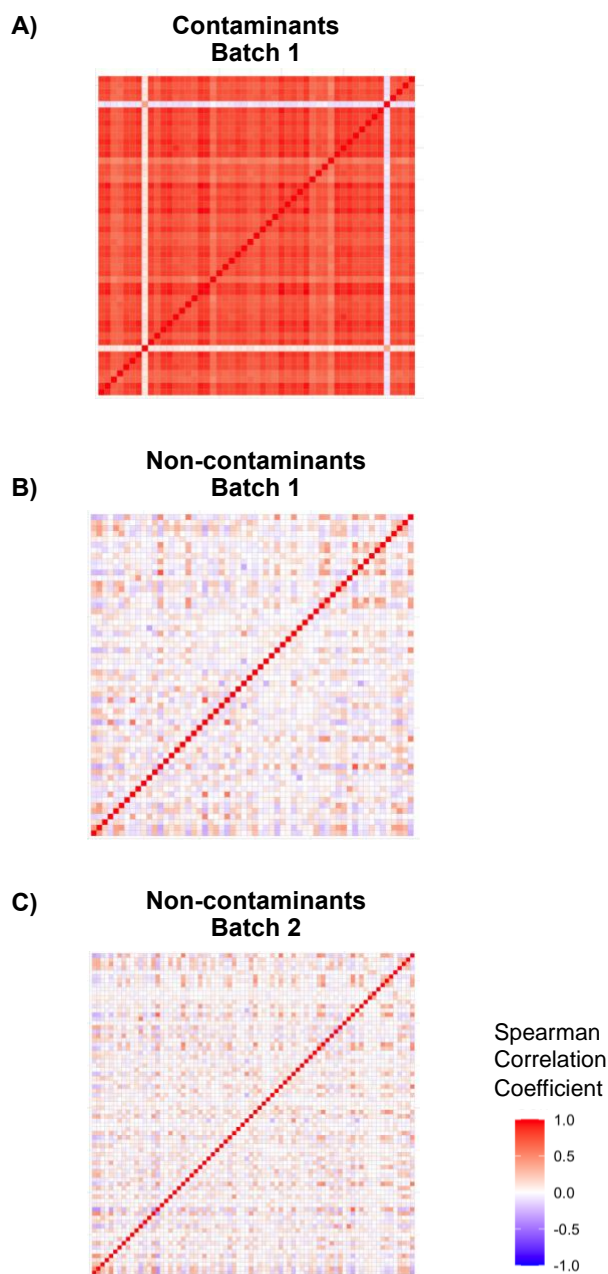

Supplement: 40168_2020_998_MOESM2_ESM.pdf [file 40168_2020_998_MOESM2_ESM.pdf]
